# Supplementary material for: Structural characterisation of amyloid-like fibrils formed by an amyloidogenic peptide segment of β-lactoglobulin
Source: PubMed Central journal article supplement — RSC Adv. 2021 Aug 17;11(45):27868–79. doi: 10.1039/d1ra03575d (PMC9037834; doi:10.1039/d1ra03575d), 2021-08-17
Supplement: RA-011-D1RA03575D-s001.pdf [file RA-011-D1RA03575D-s001.pdf]

## Electronic Supplementary Information

# Structural Characterisation of Amyloid-like Fibrils Formed by an Amyloidogenic Peptide Segment of $\beta$ - Lactoglobulin

Vasantha Gowda <sup>a</sup>, Michal Biler <sup>b</sup>, Andrei Filippov <sup>cd</sup>, Malisa V. Mantonico <sup>a</sup>, Eirini Ornithopoulou <sup>a</sup>,  
Mathieu Linares <sup>bef</sup>, Oleg N. Antzutkin <sup>cg</sup>, Christofer Lendel <sup>\*a</sup>

<sup>a</sup> Dept. of Chemistry, KTH Royal Institute of Technology, Stockholm, Sweden.

<sup>b</sup> Dept. of Theoretical Chemistry, KTH Royal Institute of Technology, Stockholm, Sweden.

<sup>c</sup> Chemistry of Interfaces, Luleå University of Technology, Sweden.

<sup>d</sup> Dept. Medical and Biological Physics, Kazan State Medical University, 420012, Kazan, Russia.

<sup>e</sup> Laboratory of Organic Electronics and Group of Scientific visualization, ITN, Linköping University,  
60174 Norrköping, Sweden

<sup>f</sup> Swedish e-Science Research Centre (SeRC), Linköping University, 60174 Norrköping, Sweden

<sup>g</sup> Dept. of Physics, University of Warwick, Coventry, UK.

\* Correspondence to C.L.: [lendel@kth.se](mailto:lendel@kth.se)

**Table S1.**  $^1\text{H}$  { $\text{H}_2\text{O}+\text{D}_2\text{O}$  (10%) solution} Chemical shift table for the  $\beta\text{-LG}_{11-20}$  peptide are compared with random coil chemical shifts<sup>49</sup>.

|          | $\text{H}^{\text{N}}$ | $\text{H}^{\alpha}$ | $\text{H}^{\beta 1}$ | $\text{H}^{\beta 2}$ | $\text{H}^{\gamma 1}$ | $\text{H}^{\gamma 2}$ | $\text{H}^{\delta}$ | $\text{H}^{\epsilon 1}$ | $\text{H}^{\epsilon 2}$ |
|----------|-----------------------|---------------------|----------------------|----------------------|-----------------------|-----------------------|---------------------|-------------------------|-------------------------|
| <i>D</i> | 8.27                  | 4.62                | 2.7                  | 2.57                 |                       |                       |                     |                         | 8.27                    |
| <i>I</i> | 8.08                  | 4.06                | 1.78                 |                      | 1.38                  | 1.1                   | 0.8                 |                         | 8.08                    |
| <i>Q</i> | 8.34                  | 4.21                | 1.96                 | 1.88                 | 2.25                  |                       |                     | 7.17/7.08               | 8.34                    |
| <i>K</i> | 8.21                  | 4.22                | 1.64                 | 1.55                 | 1.25                  |                       |                     |                         | 8.21                    |
| <i>V</i> | 8.05                  | 4.03                | 1.97                 | -                    | 0.88                  | 0.81                  |                     |                         | 8.05                    |
| <i>A</i> | 8.4                   | 4.23                | 1.31                 |                      |                       |                       |                     |                         | 8.4                     |
| <i>G</i> | 8.26                  | 3.86                |                      |                      |                       |                       |                     |                         | 8.26                    |
| <i>T</i> | 7.84                  | 4.2                 | 3.97                 |                      | 0.96                  |                       |                     |                         | 7.84                    |
| <i>W</i> | 8.08                  | 4.54                | 3.12                 |                      |                       |                       |                     |                         | 8.08                    |
| <i>Y</i> | 7.7                   | 4.31                | 2.78                 | 2.66                 |                       |                       |                     |                         | 7.7                     |

**Table S2.** Backbone torsion angles  $\phi$  and  $\psi$  in  $\beta\text{-LG}_{11-20}$  fibrils obtained using TALOS and MD simulations.

|   | Predicted<br>TALOS $\phi$<br>angle in<br>fibrils | Predicted<br>TALOS $\psi$<br>angle in<br>fibrils | MD simulated $\beta$ -sheet<br>structure (AB4) |              | MD simulated $\beta$ -sheet<br>structure (AA3) |              |
|---|--------------------------------------------------|--------------------------------------------------|------------------------------------------------|--------------|------------------------------------------------|--------------|
|   |                                                  |                                                  | $\phi$ angle                                   | $\psi$ angle | $\phi$ angle                                   | $\psi$ angle |
| D | -                                                | -                                                | $-80 \pm 8$                                    | $125 \pm 12$ | $-90 \pm 14$                                   | $121 \pm 13$ |
| I | -122.218                                         | 123.814                                          | $-113 \pm 12$                                  | $126 \pm 16$ | $-118 \pm 14$                                  | $127 \pm 12$ |
| Q | -112.957                                         | 137.24                                           | $-121 \pm 16$                                  | $130 \pm 11$ | $-113 \pm 13$                                  | $130 \pm 10$ |
| K | -120.806                                         | 132.618                                          | $-133 \pm 10$                                  | $130 \pm 10$ | $-124 \pm 11$                                  | $121 \pm 16$ |
| V | -117.161                                         | 125.93                                           | $-127 \pm 13$                                  | $135 \pm 10$ | $-128 \pm 9$                                   | $133 \pm 6$  |
| A | -112.417                                         | 126.779                                          | $-144 \pm 13$                                  | $141 \pm 22$ | $-137 \pm 19$                                  | $134 \pm 27$ |
| G | -119.366                                         | 135.807                                          | $-111 \pm 23$                                  | $113 \pm 24$ | $-94 \pm 28$                                   | $118 \pm 25$ |
| T | -127.937                                         | 136.017                                          | $-137 \pm 14$                                  | $137 \pm 19$ | $-125 \pm 16$                                  | $120 \pm 18$ |
| W | -107.677                                         | 134.448                                          | $-124 \pm 14$                                  | $129 \pm 19$ | $-117 \pm 16$                                  | $122 \pm 35$ |
| Y | -                                                | -                                                | $-113 \pm 14$                                  | $102 \pm 26$ | $-94 \pm 24$                                   | $112 \pm 17$ |

\* Data are extracted from the last 5 ns of relevant MD simulations with 500 points collected (10 ps/point) per each amino acid.

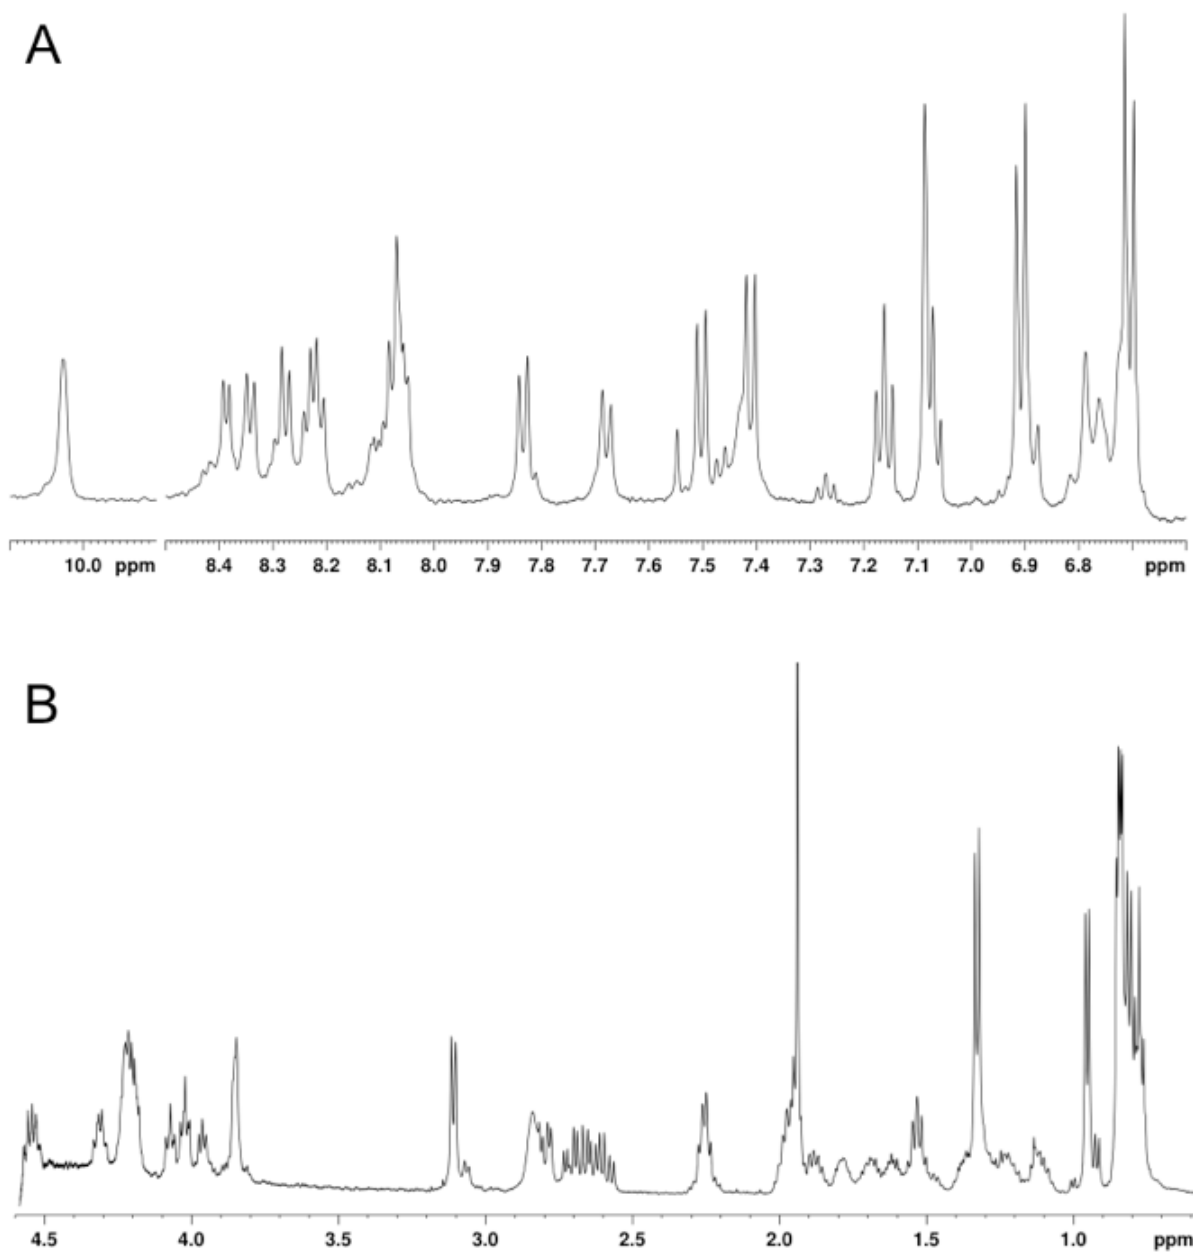

**Figure S1.** <sup>1</sup>H NMR spectrum of the β-LG<sub>11-20</sub> peptide in H<sub>2</sub>O+10% D<sub>2</sub>O solution, expanded regions: A) 6.6-10.1 ppm B) 0.5- 4.6 ppm.

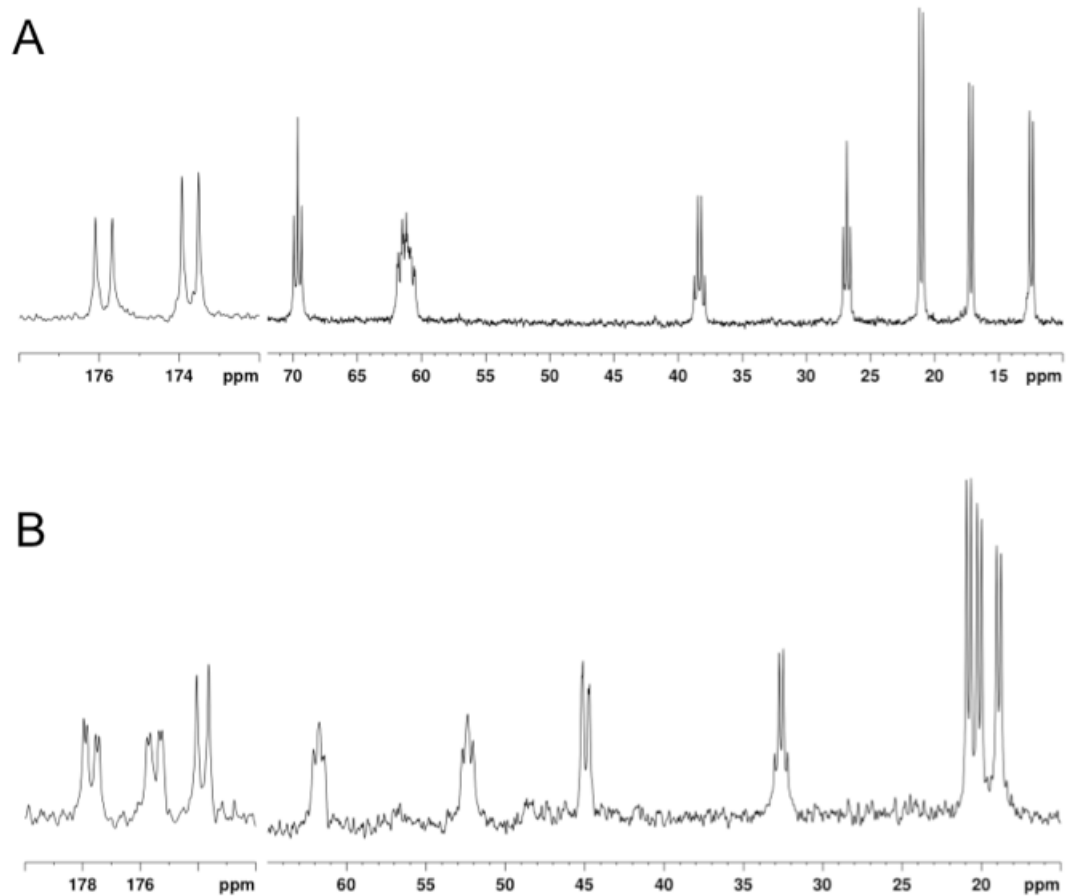

**Figure S2.** **A)**  $^{13}\text{C}$  ( $^{15}\text{N}$  coupled) NMR spectrum of the uniformly  $^{13}\text{C}/^{15}\text{N}$  labelled (I and T residues)  $\beta$ -LG<sub>11-20</sub> peptide in H<sub>2</sub>O+10% D<sub>2</sub>O solution. **B)**  $^{13}\text{C}$  ( $^{15}\text{N}$  coupled) NMR spectrum of the uniformly  $^{13}\text{C}/^{15}\text{N}$  labelled (V, A, and G residues)  $\beta$ -LG<sub>11-20</sub> peptide in H<sub>2</sub>O+10% D<sub>2</sub>O solution.

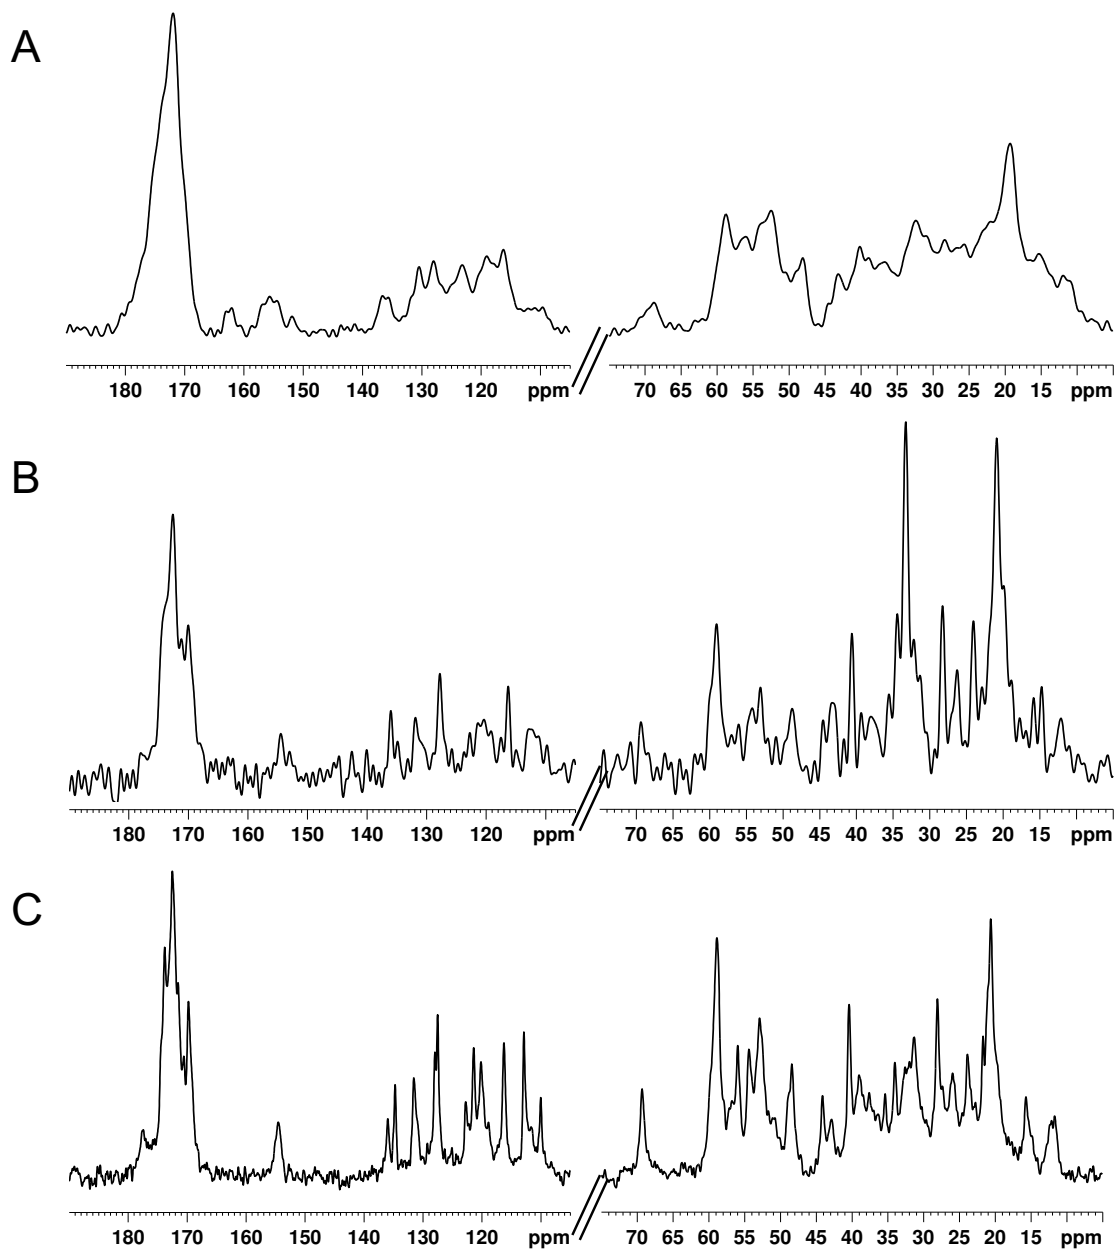

**Figure S3.** **A)**  $^{13}\text{C}$  CP-MAS NMR spectrum of monomeric unlabelled  $\beta\text{-LG}_{11-20}$  peptide (20480 acquisitions, 2.5 s relaxation delay, and 1.5 ms contact time). **B)**  $^{13}\text{C}$  CP-MAS NMR spectrum of lyophilised unlabelled  $\beta\text{-LG}_{11-20}$  fibrils (40960 acquisitions, 2.5 s relaxation delay, and 1.5 ms contact time). **C)**  $^{13}\text{C}$  CP-MAS NMR spectrum of fully hydrated unlabelled  $\beta\text{-LG}_{11-20}$  fibrils (61440 acquisitions, 2.5 s relaxation delay, and 1.5 ms contact time).

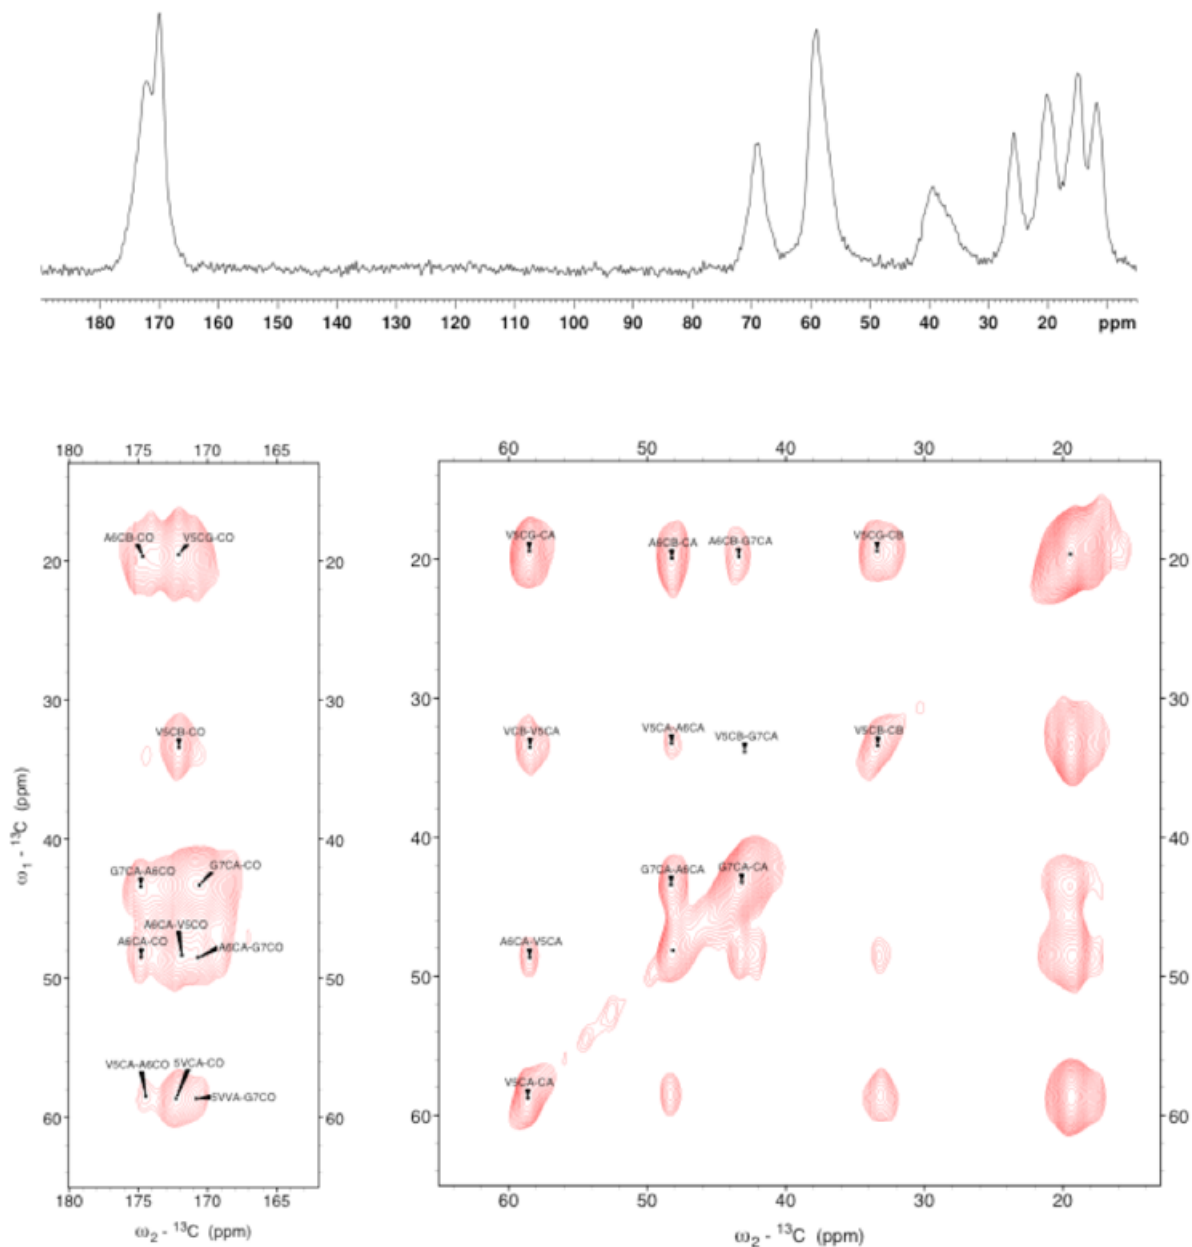

**Figure S4 A)**  $^{13}\text{C}$  CP-MAS NMR spectrum of the uniformly  $^{13}\text{C}/^{15}\text{N}$  labelled (V, A, and G residues)  $\beta$ -LG<sub>11-20</sub> peptide (1024 acquisitions, 2.5 s relaxation delay, and 1.5 ms contact time). **B)**  $^{13}\text{C}$ - $^{13}\text{C}$  solid-state PDSO NMR spectra of non-fibrillar peptide-VAG (DIQKVAGTWY)

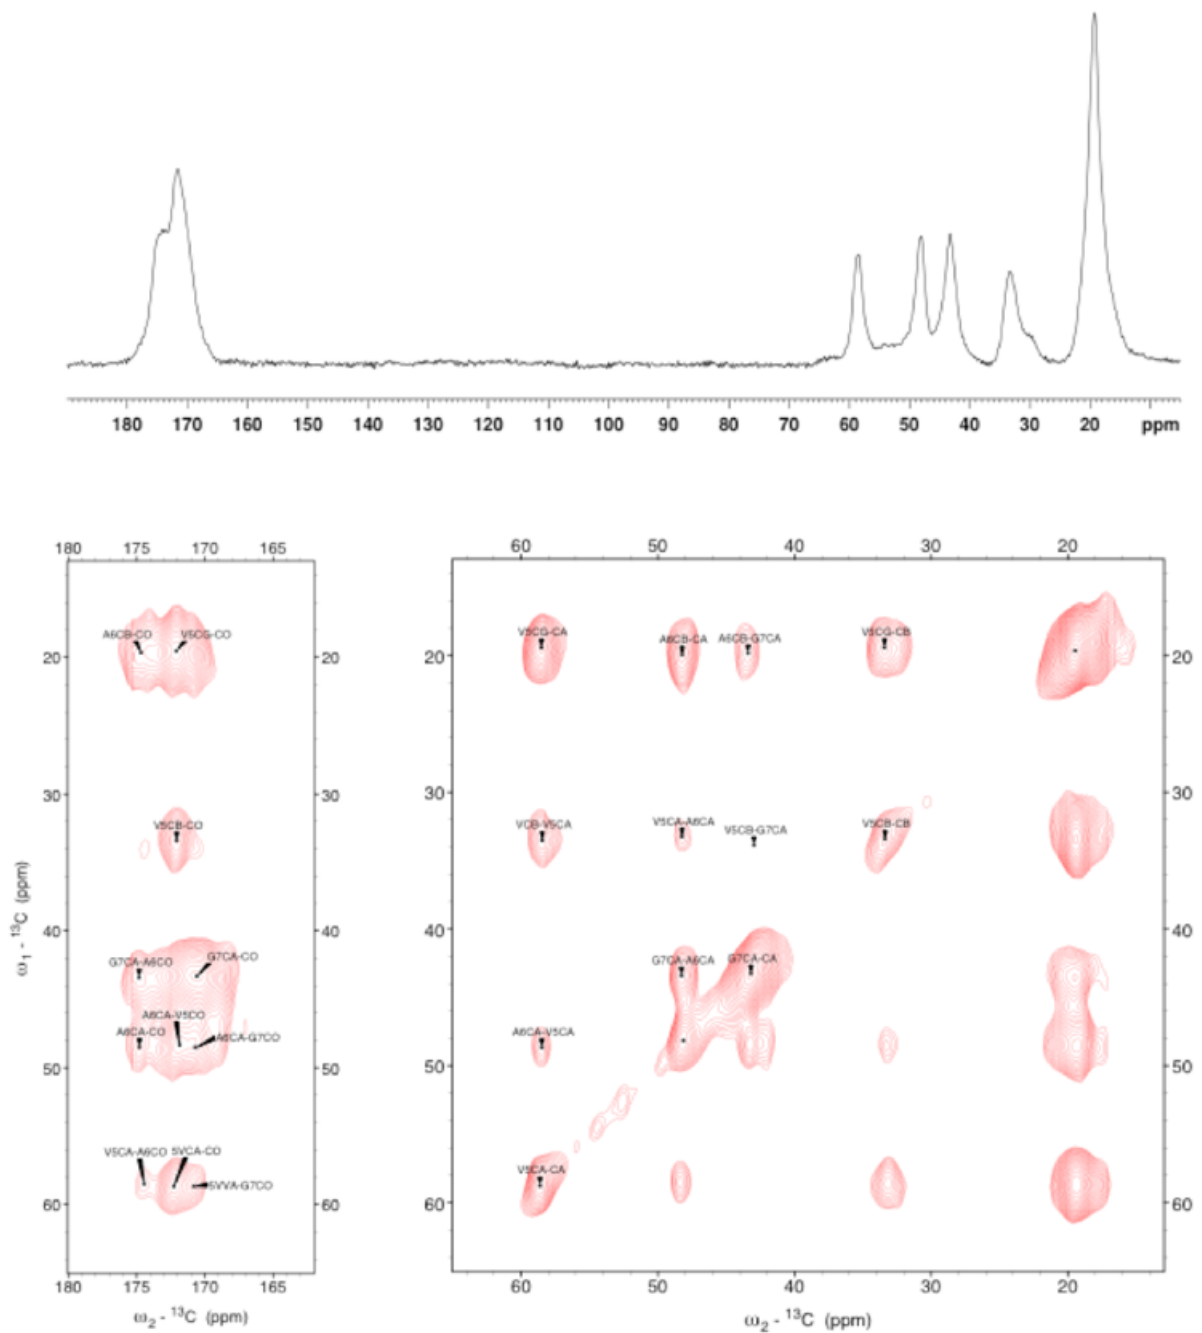

**Figure S5.** **A)**  $^{13}\text{C}$  CP-MAS NMR spectrum of the uniformly  $^{13}\text{C}/^{15}\text{N}$  labelled (I and T residues)  $\beta$ -LG<sub>11-20</sub> peptide (1024 acquisitions, 2.5 s relaxation delay, and 1.5 ms contact time). **B)**  $^{13}\text{C}$ - $^{13}\text{C}$  solid-state PDSM NMR spectra of non-fibrillar peptide-IT(DIQKVAGTWY)

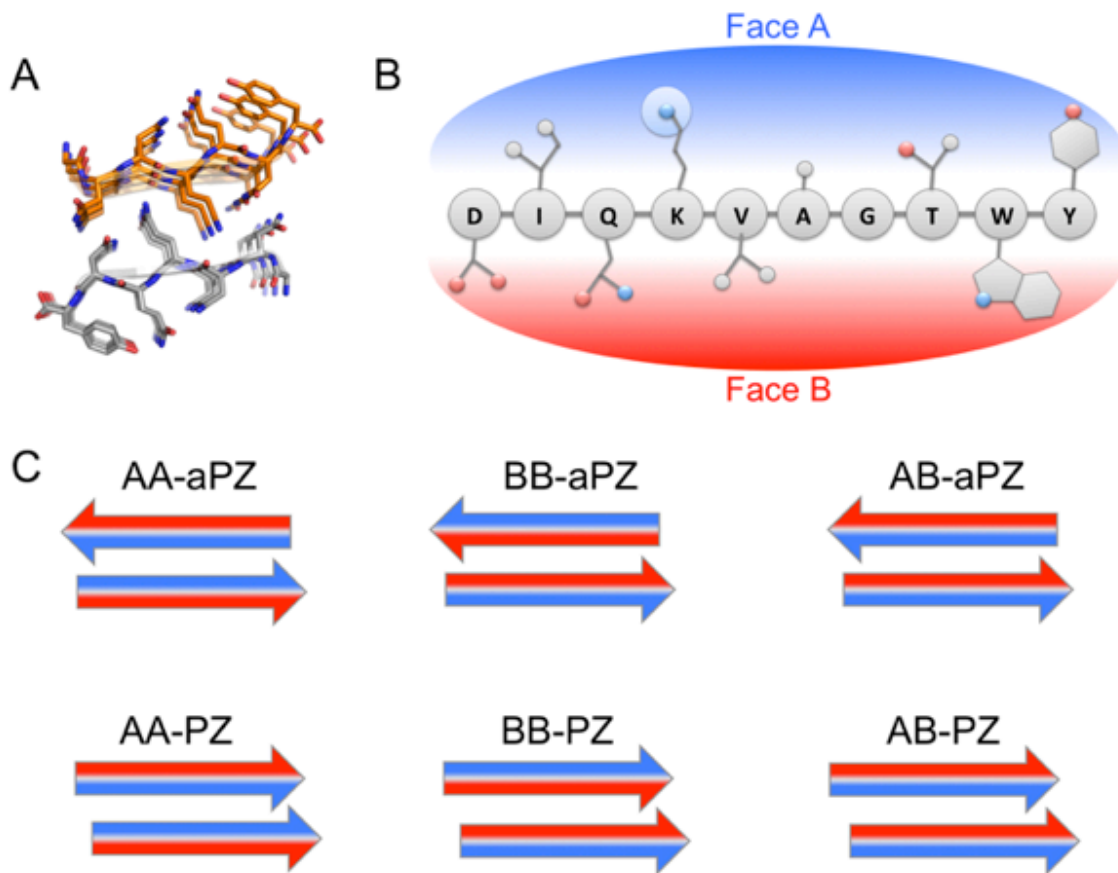

**Figure S6.** **A)** Illustration of a steric zipper structure (from PDB ID 1YJP). **B)** The two faces of the  $\beta$ -LG<sub>11-20</sub> peptide in extended strand conformation. **C)** Potential packing of anti-parallel (top row) and parallel (bottom row)  $\beta$ -sheet in “steric zippers”. The colours indicate the faces as shown in panel B.



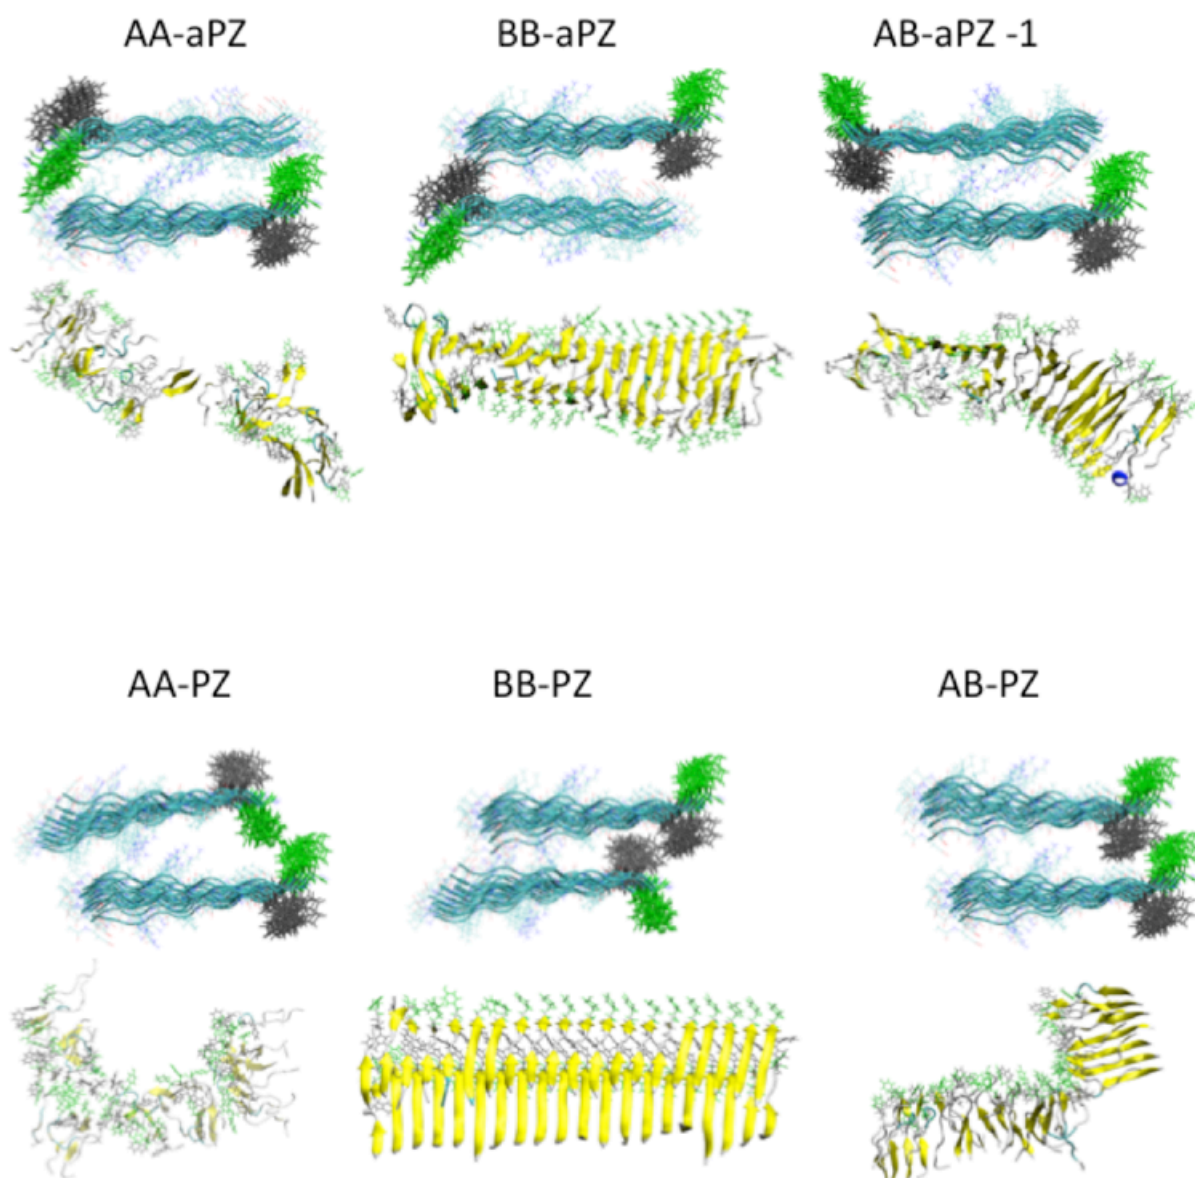

**Figure S7.** Six different arrangements of 40 peptides, considered in our 30 ns long MD simulations, in the *anti-parallel* A-A, B-B and A-B, and the *parallel* A-A, B-B and A-B zipper mode packing. Tyrosine and tryptophan moieties are shown in green and gray, respectively, and the beta sheet structures are highlighted in yellow. The most stable arrangements, BB-aPZ and BB-PZ, have *ca* 50 more H-bonding interactions and keep stable configuration during the simulation time with respect to the  $\pi$ - $\pi$  stacking interactions.
